# Supplementary material for: Development of Swallowing Function in Infants with Oral Feeding Difficulties
Source: Hindawi journal article supplement (doi:10.1155/2020/5437376), 2020-02-03

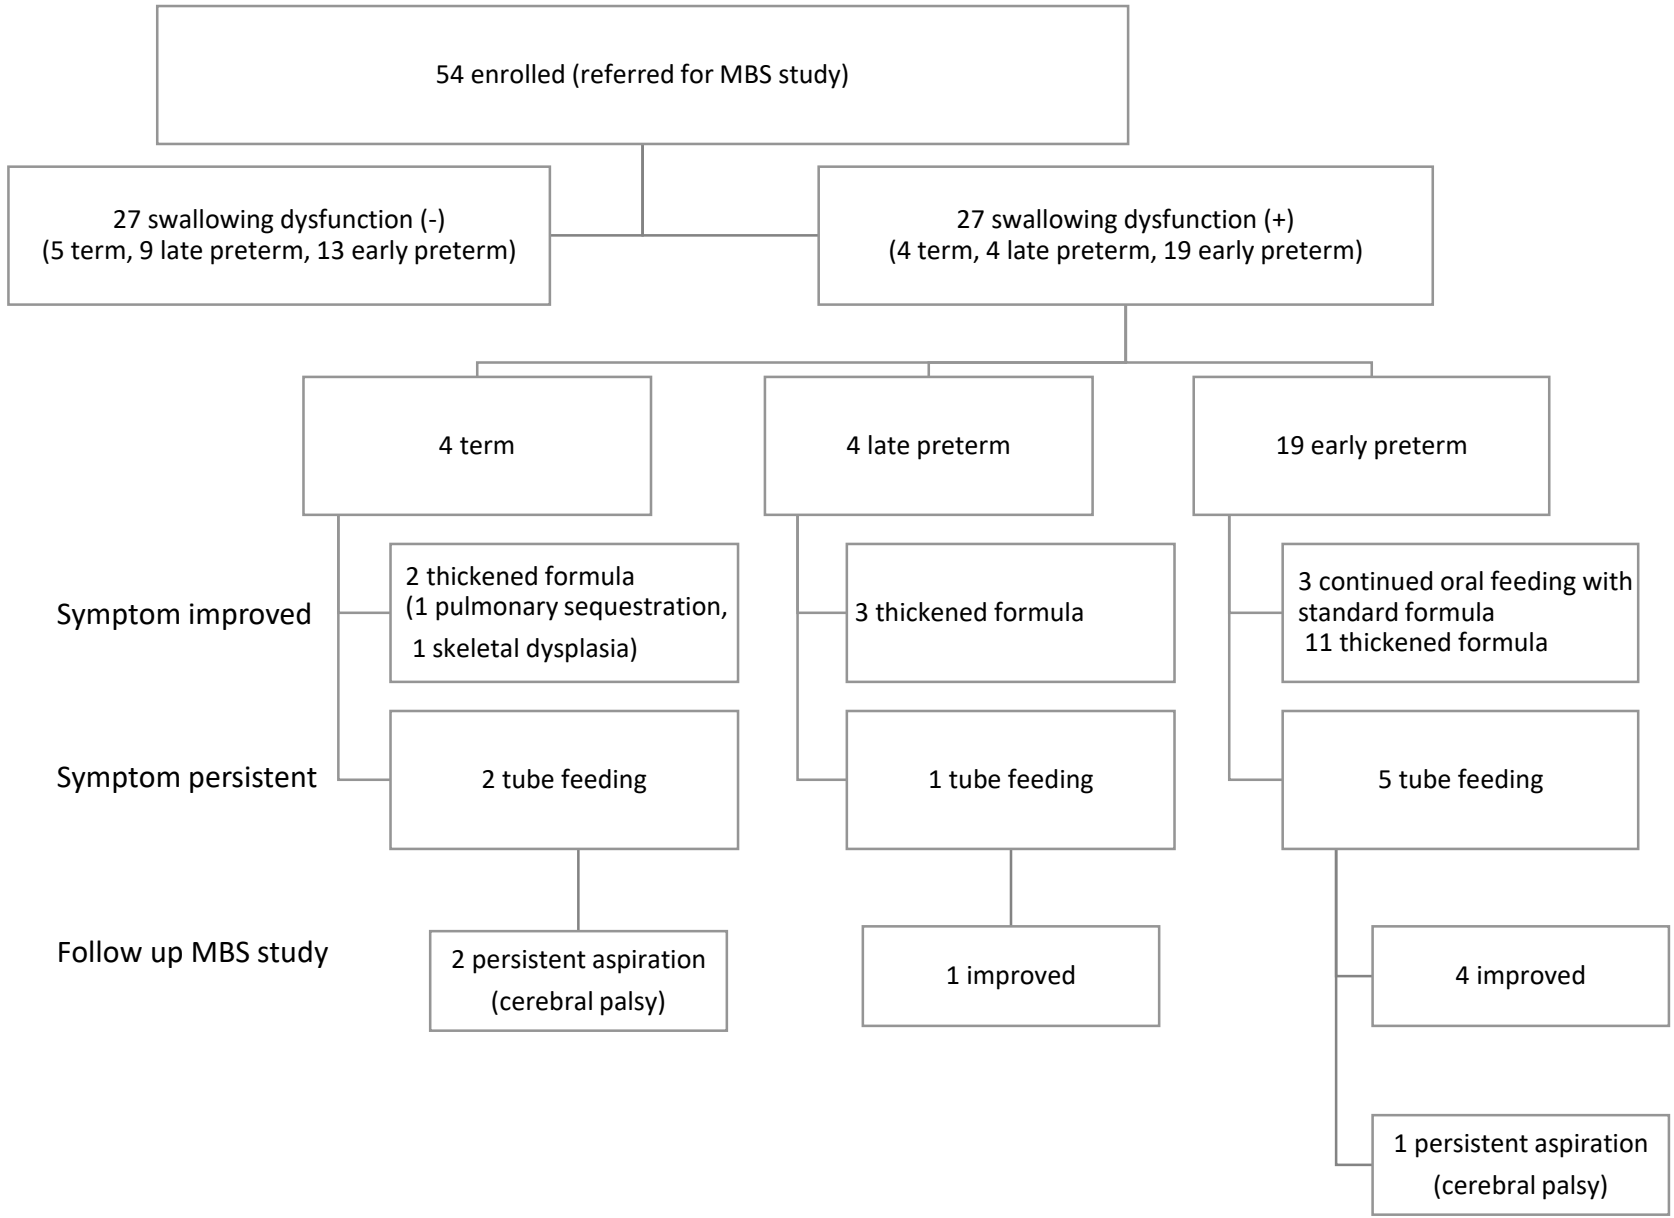

Supplement: f1 [file 5437376.f1.pdf]
